# Supplementary material for: A resampling-based meta-analysis for detection of differential gene expression in breast cancer
Source: PubMed Central journal article supplement (PMC2631593; doi:10.1186/1471-2407-8-396), 2008-12-30
Supplement: 1471-2407-8-396-S3.pdf [file 1471-2407-8-396-S3.pdf]

**Additional file 3.** The genes and gene specific primers used in this study

| <b>Gene Name</b>                                               | <b>Gene symbol</b> | <b>Accession No/primer sequence [5'-3']</b>                                  | <b>Amplicon Size (bp)</b> |
|----------------------------------------------------------------|--------------------|------------------------------------------------------------------------------|---------------------------|
| RAD21 homolog (S. pombe)                                       | <i>RAD21</i>       | NM_006265<br>Forward: accaatgccaaccatgactg<br>Reverse: cttcctcttctcttggctt   | 114                       |
| Gelsolin                                                       | <i>GSN</i>         | NM_198252<br>Forward: ttcgagtcggccaccttct<br>Reverse: tctgcaccaccacctgtg     | 108                       |
| Cytochrome c oxidase subunit Vic                               | <i>COX6C</i>       | NM_004374<br>Forward: tcaggaaggacgttggtgtt<br>Reverse: gcacgaatgctacagccata  | 138                       |
| v-maf musculoaponeurotic fibrosarcoma oncogene homolog (avian) | <i>MAF</i>         | NM_005360<br>Forward: tggagtcggagaagaaccag<br>Reverse: gcttccaaaatgtggcgtatT | 228                       |

|                                                      |                                     |                                                           |     |
|------------------------------------------------------|-------------------------------------|-----------------------------------------------------------|-----|
| Secreted frizzled-related protein 1                  | <i>SFRP1</i><br>Forward<br>Reverse  | NM_003012<br>ccgagatgcttaagtgtgac<br>ctcgtggcacagagatgtt  | 163 |
| Spectrin, beta, non-erythrocytic 1                   | <i>SPTBN1</i><br>Forward<br>Reverse | NM_003128<br>ggatcacagacctgtacact<br>tctcaagatggactctctgc | 173 |
| G1 to S phase transition 1                           | <i>GSPT1</i><br>Forward<br>Reverse  | NM_002094<br>cacctgtggaatcctctcaa<br>cctggctctgcttcacttat | 157 |
| Non-metastatic cells 1, protein (NM23A) expressed in | <i>NME1</i><br>Forward<br>Reverse   | NM_198175<br>tgtgagcgtaccttcattgc<br>aagaatggacggtccttcag | 173 |
| Pituitary tumor-transforming 1                       | <i>PTTG1</i><br>Forward<br>Reverse  | NM_004219<br>cctcagatgatgcctatcca<br>atcatgagaggcactccact | 127 |

|                                                                                                    |                                      |                                                               |     |
|----------------------------------------------------------------------------------------------------|--------------------------------------|---------------------------------------------------------------|-----|
| Fibronectin 1                                                                                      | <i>FNI</i><br>Forward<br>Reverse     | NM_212476.1<br>gcaagaggcaggctcagcaa<br>gcggacctacctaggcaatg   | 112 |
| Inhibitor of DNA binding 4, dominant negative helix-loop-helix protein                             | <i>ID4</i><br>Forward<br>Reverse     | NM_001546.2<br>tctgcagcacgttatcgac<br>ctctctagtgtcctggctc     | 263 |
| Epidermal growth factor receptor (erythroblastic leukemia viral (v-erb b) oncogene homolog, avian) | <i>EGFR</i><br>Forward<br>Reverse    | NM_005228.3<br>gcaagaggcaggctcagcaa<br>gcggacctacctaggcaatg   | 227 |
| A disintegrin-like and metalloprotease (reprolysin type) with thrombospondin type 1 motif, 1       | <i>ADAMTS1</i><br>Forward<br>Reverse | NM_006988.3<br>ggctgatgttgaactgtgt<br>acacgtggcctaattcatgg    | 104 |
| Activating transcription factor 3                                                                  | <i>ATF3</i><br>Forward<br>Reverse    | NM_001040619.1<br>gcactccgtcttctcttct<br>agaacaagcacctctgccac | 191 |

|                                                               |                                     |                                                            |     |
|---------------------------------------------------------------|-------------------------------------|------------------------------------------------------------|-----|
| Insulin-like growth factor binding protein 6                  | <i>IGFBP6</i><br>Forward<br>Reverse | NM_002178.2<br>attgtgaccatcgaggcttc<br>aggagcttcattgccatct | 132 |
| Prion protein (p27-30)                                        | <i>PRNP</i><br>Forward<br>Reverse   | NM_000311.3<br>gcgagcttctcctctcctca<br>gtgtccatcctccaggctt | 140 |
| Succinate dehydrogenase complex, subunit A, flavoprotein (Fp) | <i>SDHA</i><br>Forward<br>Reverse   | NM_004168<br>tgggaacaagaggcatctg<br>ccaccactgcatcaaattcatg | 86  |
| Beta-actin                                                    | <i>ACTB</i><br>Forward<br>Reverse   | NM_001101<br>ccaaccgcgagaagatgacc<br>ggagtccatcacgatgccag  | 124 |
| TATA box binding protein                                      | <i>TBP</i><br>Forward<br>Reverse    | NM_003194<br>tgcacaggagccaagagtgaa<br>cacatcacagctccccacca | 132 |
