# Supplementary material for: A resampling-based meta-analysis for detection of differential gene expression in breast cancer
Source: PubMed Central journal article supplement (PMC2631593; doi:10.1186/1471-2407-8-396), 2008-12-30

**Additional file 4:** The correlation of global median and quantile normalized data of ductal (D) and normal (N) tissue samples.

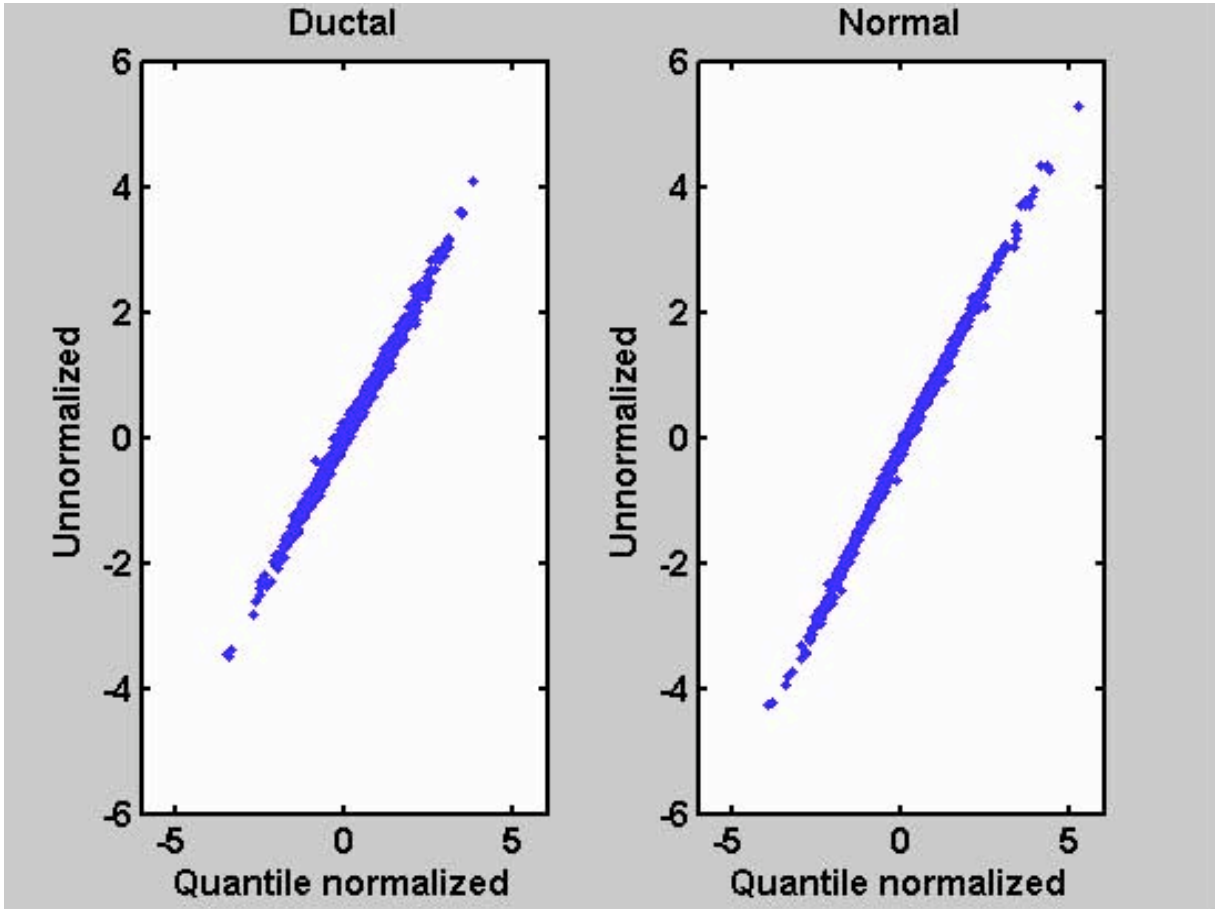

Supplement: 1471-2407-8-396-S4.pdf [file 1471-2407-8-396-S4.pdf]
